# Supplementary material for: epiG: statistical inference and profiling of DNA methylation from whole-genome bisulfite sequencing data
Source: PubMed Central journal article supplement (PMC5320668; doi:10.1186/s13059-017-1168-4), 2017-02-21

# EpiG: statistical inference and profiling of DNA methylation from whole-genome bisulphite sequencing data

Martin Vincent\*, Kamilla Mundbjerg, Jakob Skou Pedersen,  
Gangning Liang, Peter A. Jones, Torben Falck Ørntoft,  
Karina Dalsgaard Sørensen, Carsten Wiuf

February 18, 2017

## 1 Statistical algorithms and optimisation

A self-mapping  $T$  on a space  $X$  is a function  $T$  from  $X$  to  $X$ ,  $T: X \rightarrow X$ . The theoretical basis for optimisation of the posterior likelihood in equation (3) in the main text is the following observation:

**Proposition** *Let  $X$  be a finite discrete space and  $f: X \rightarrow \mathbb{R}$  any function. Consider a collection of self-mappings  $T_0, \dots, T_{m-1}$  on  $X$ , such that for all  $i = 0, \dots, m-1$ , and all  $x \in X$ , it holds that*

(1)  $f(T_i x) \geq f(x)$ ,

(2) If  $f(T_i x) = f(x)$  then  $T_i x = x$ .

Then for any  $x_0 \in X$ , the iterated sequence  $(x_n)_{n \geq 0}$ , defined by

$$x_{n+1} = T_{(n \bmod m)} x_n$$

converges in a finite number of steps. Moreover, the limit of  $(x_n)_{n \geq 0}$  is a simultaneous fixed point of the self-mappings  $T_0, \dots, T_{m-1}$ .

Note that every point in the set  $\arg \max_{x \in X} f(x)$ , that is, the set of  $x \in X$  for which  $f(x)$  attains its maximum, is a simultaneous fixed point of the self-mappings  $T_0, \dots, T_{m-1}$ .

### 1.1 Algorithm for maximisation of the haplotype structure posterior likelihood

In this section we describe the proposed algorithm for finding an approximate maximiser  $(\widehat{B}, \widehat{G}, \widehat{R})$  of the posterior likelihood

$$\Lambda(B, G, R) = \pi_0(B)\pi_1(G|B)\mathcal{L}(B, G, R), \tag{1}$$

which is equation (3) in the main text. The algorithm is guaranteed to converge in a finite number of steps due to the proposition above, but may (in rare cases) only

---

\*Address for correspondence: martin.vincent.dk@gmail.com

return a near optimal solution. We observe that a maximiser of (1) can be found by first finding a maximiser  $\widehat{B}$  of

$$\log \widetilde{\Lambda}(B) = \log \pi_0(B) + \max_{G,R} (\log \pi_1(G|B) + \log \mathcal{L}(B, G, R)) \quad (2)$$

and then a maximiser  $(\widehat{G}, \widehat{R})$  of

$$\log \widetilde{\Lambda}(G, R | \widehat{B}) = \log \pi_1(G | \widehat{B}) + \log \mathcal{L}(\widehat{B}, G, R). \quad (3)$$

For a given haplotype structure  $\widehat{B}$  the maximizer of the term (3) can be computed directly/easily. This means that the optimal epigenotype assignment  $\widehat{G}$  and strand assignment  $\widehat{R}$  may subsequently be found from (3). Hence, the primary problem is to find a maximiser of the objective (2). The reason for splitting the task into two optimisation problems is that we do not need store the current estimates of  $(G, R)$  as they are easily found from (3).

In (2) we are optimising over the space  $X$  of haplotype structures. Each haplotype chain is indexed by a number. With  $n$  being the total number of reads, the maximal number of haplotype chains is  $n$  (one chain for each read), we may, therefore, take  $X = \{1, \dots, n\}^n$ .

Let  $\widehat{\mathcal{B}}_i \subseteq \{1, \dots, n\}$  denote the set of feasible haplotype chains overlapping read  $i$ , and note that this include the current haplotype chain of read  $i$ . For a haplotype structure  $B = (b_1, \dots, b_n) \in X$ , define

$$\mathcal{B}_i(B) = \widehat{\mathcal{B}}_i \cup \left( \{1, \dots, n\} \setminus \bigcup_{j=1}^n \{b_j\} \right),$$

where  $M_1 - M_2$  is the set difference between two sets  $M_1$  and  $M_2$ . The set  $\mathcal{B}_i(B)$  is the set of indices of haplotype chains overlapping read  $i$ , in addition to those indices that are currently not used.

For  $\tilde{b} \in \mathcal{B}_i(B)$  the haplotype structure  $(b_1, \dots, b_{i-1}, \tilde{b}, b_{i+1}, \dots, b_n)$  may not be feasible, even if  $B$  is feasible, since the removal of read  $i$  from chain  $b_i$  may destroy the feasibility of the chain, for example by creating a ‘‘hole’’ in the chain, that is, a position  $j \in [s_b, s_b + L_b]$  with read depth  $c(b_i, j) = 0$ . The feasibility may be corrected by splitting the haplotype chain  $b_i$  into two or more feasible chains. We denote the corresponding self-mapping by  $S_i$  and the set of feasible candidate haplotype structures by

$$F_i(B) = \{S_i(b_1, \dots, b_{i-1}, b, b_{i+1}, \dots, b_n) \mid b \in \mathcal{B}_i(B)\}.$$

An optimisation procedure may be constructed by choosing  $n$  self-mappings  $B_1^*, \dots, B_n^*$  on  $X$  such that

$$B_i^*(B) \in \arg \max_{x \in F_i(B)} \log \widetilde{\Lambda}(x)$$

for  $i = 1, \dots, n$ . Note that since  $B \in F_i(B)$  we may have  $B_i^*(B) = B$ . We also note that the  $i$ th read is allowed to be reallocated to an existing haplotype chain or to a

new haplotype chain, namely a chain assigned to an element of  $\{1, \dots, n\} - \bigcup_{i=1}^n \{b_i\}$ . Moreover, the set  $F_i(B)$  is a finite and generally relatively small set, hence the computation of these mappings are relatively inexpensive. Then for  $i = 1, \dots, n$ , define

$$T_i B = \begin{cases} B & \text{if } B \in \arg \max_{x \in F_i(B)} \log \tilde{\Lambda}(x) \\ B_i^*(B) & \text{otherwise.} \end{cases}$$

Evidently  $T_1, \dots, T_n$  fulfil condition (1) and (2) in the above proposition. Furthermore,  $T_1, \dots, T_n$  maps feasible haplotype structures onto feasible haplotype structures.

If we generate a sequence by applying these self-mappings, then by the above proposition, it converges to a simultaneous fixed point of  $T_1, \dots, T_n$  in a finite number of steps. Hence, our algorithm will return a feasible haplotype structure  $B$  which is optimal in the sense that moving a single read to another chain, and ensuring feasibility of the haplotype structure implied by this move, then the posterior likelihood  $\Lambda$  will decrease.

## 2 Implementation and configuration

An implementation of epiG is available as an R package `epiG`. Currently, there is a version on GitHub

<https://github.com/vincent-dk/epiG>.

It can be installed using the R command:

```
# install.packages("devtools")
devtools::install_github("vincent-dk/epiG-pkg")
```

Essential scripts used for data analysis and information on how to use `epiG` is available on GitHub

[github.com/vincent-dk/using-epiG](https://github.com/vincent-dk/using-epiG).

### 2.1 A simple example

For standard use, `auto_config` will generate the standard configuration for WGBS and for NOME-seq data, see a simple example in Listing 1. The method `chain_info` retrieve information about the inferred haplotype chains.

### 2.2 Configuration and conversion models

The statistical conversion model, that is the distribution  $\mathbf{P}(Z = z \mid g, r)$ , is fully configurable. In normal running mode the same statistical conversion model is applied to all position and the position dependent base-calling reliability being incorporated through equation (1) in the main text. However, the model can be made context dependent (this feature is not used in the examples in the paper, except for NOME-seq data). The distribution is specified by lists of matrices.

The standard bisulphite conversion model can be generated using the command:

```
model <- BSeq()
```

### Listing 1 Simple example of using the epiG package

```
# Load epiG package
library(epiG)

# Specify site (GNAS)
chr <- "chr20"
start <- 57380000
end <- 57478000

# Create epiG configuration
config <- auto_config(
  bam_file = "SRX332736_sorted.bam",
  ref_file = "hg19_rCRSchrn.fa",
  alt_file = "dbsnp_135.hg19.fa",
  chr = chr,
  start = start,
  end = end)

# Run epiG
g <- epiG(max_threads = 3, config = config)

# Load additional data into model
g <- fetch_reads(g) # Load reads
g <- fetch_ref(g) # Load reference genome
g <- fetch_alt(g) # Load alternative nucleotides

# Print a summary of the inferred epigenomic haplotypes
g
```

### Listing 2 Information about haplotype chains

```
> cinfo <- chai_info(g)
> cinfo
```

|   | chain.id | start    | end      | length | nreads | nreads.fwd | nreads.rev | depth.fraction |
|---|----------|----------|----------|--------|--------|------------|------------|----------------|
| 1 | 1        | 57415050 | 57415300 | 251    | 10     | 3          | 7          | 0.036822492    |
| 2 | 2        | 57415050 | 57415300 | 251    | 182    | 69         | 113        | 0.671733756    |
| 3 | 3        | 57415050 | 57415070 | 21     | 2      | 0          | 2          | 0.125156446    |
| 4 | 4        | 57415050 | 57415300 | 251    | 127    | 56         | 71         | 0.468398332    |
| 5 | 5        | 57415115 | 57415289 | 175    | 2      | 2          | 0          | 0.009851731    |
| 6 | 6        | 57415131 | 57415296 | 166    | 2      | 2          | 0          | 0.010417752    |
| 7 | 7        | 57415132 | 57415284 | 153    | 2      | 0          | 2          | 0.011361054    |

### Listing 3 Information about inferred genotype

```
> info <- position_info(g, 57415143 + c(0,1))
> info[, c("position", "chain.id", "ref", "genotype", "fit.ratio",
  "methylated", "nreads.fwd", "nreads.rev")]
```

|    | position | chain.id | ref | genotype | fit.ratio    | methylated | nreads.fwd | nreads.rev |
|----|----------|----------|-----|----------|--------------|------------|------------|------------|
| 1  | 57415143 | 1        | C   | C        | -37.5505611  | NA         | 0          | 2          |
| 2  | 57415143 | 2        | C   | C        | -898.5909394 | TRUE       | 21         | 35         |
| 4  | 57415143 | 4        | C   | C        | -336.3580702 | FALSE      | 20         | 18         |
| 5  | 57415143 | 5        | C   | C        | -20.9756797  | TRUE       | 1          | 0          |
| 6  | 57415143 | 6        | C   | C        | -20.0545543  | TRUE       | 1          | 0          |
| 7  | 57415143 | 7        | C   | C        | -20.1571365  | NA         | 0          | 1          |
| 11 | 57415144 | 1        | G   | G        | -0.7762233   | FALSE      | 0          | 2          |
| 21 | 57415144 | 2        | G   | G        | -909.3393081 | TRUE       | 21         | 34         |
| 41 | 57415144 | 4        | G   | G        | -334.5881731 | FALSE      | 19         | 18         |
| 51 | 57415144 | 5        | G   | G        | -21.0782635  | NA         | 1          | 0          |
| 61 | 57415144 | 6        | G   | G        | -21.0782635  | NA         | 1          | 0          |
| 71 | 57415144 | 7        | G   | G        | 0.1025810    | FALSE      | 0          | 1          |

The BSeq function allows the user to specify the failed bisulphite conversion rate ( $\alpha$ ) the inappropriately conversion rate ( $\beta$ ) and the maximal read length, with

standard values listed in Table S1. The function will generate two lists of matrices; one list for forward reads and one for reverse reads, see Listing 5.

#### Listing 4 Information about reads

```
> rinfo <- read_info(g)
> rinfo
```

|     | name                 | start    | end      | length | read.id | chain.id | strand |
|-----|----------------------|----------|----------|--------|---------|----------|--------|
| 1   | SRR1609024.193786394 | 57414951 | 57415051 | 101    | 1       | 2        | rev    |
| 2   | SRR1609023.192925911 | 57414954 | 57415052 | 99     | 2       | 2        | fwd    |
| 3   | SRR1609025.194393042 | 57414954 | 57415054 | 101    | 3       | 2        | rev    |
| 4   | SRR1609025.194393051 | 57414954 | 57415054 | 101    | 4       | 2        | rev    |
| 5   | SRR1609025.194393037 | 57414956 | 57415054 | 99     | 5       | 2        | rev    |
| 6   | SRR1609023.192925914 | 57414958 | 57415058 | 101    | 6       | 2        | rev    |
| 7   | SRR1609024.193786395 | 57414960 | 57415060 | 101    | 7       | 2        | rev    |
| 8   | SRR1609024.193786397 | 57414960 | 57415060 | 101    | 8       | 2        | rev    |
| 9   | SRR1609024.193786389 | 57414967 | 57415065 | 99     | 9       | 4        | fwd    |
| 10  | SRR1609023.192925912 | 57414969 | 57415067 | 99     | 10      | 3        | rev    |
| ... |                      |          |          |        |         |          |        |
| 322 | SRR1609026.195055112 | 57415295 | 57415393 | 99     | 322     | 4        | fwd    |
| 323 | SRR1609025.194393075 | 57415296 | 57415394 | 99     | 323     | 2        | fwd    |
| 324 | SRR1609025.194393111 | 57415296 | 57415396 | 101    | 324     | 2        | rev    |
| 325 | SRR1609025.194393076 | 57415299 | 57415397 | 99     | 325     | 2        | rev    |
| 326 | SRR1609023.192925955 | 57415300 | 57415398 | 99     | 326     | 4        | rev    |
| 327 | SRR1609024.193786431 | 57415300 | 57415398 | 99     | 327     | 4        | rev    |

#### Listing 5 Standard bisulphite conversion matrices

```
model$fwd[[1]]
  C G A T C~me G_me
C 0.05 0 0 0 0.95 0
G 0.00 1 0 0 0.00 1
A 0.00 0 1 0 0.00 0
T 0.95 0 0 1 0.05 0

model$rev[[1]]
  C G A T C~me G_me
C 1 0.00 0 0 1 0.00
G 0 0.05 0 0 0 0.95
A 0 0.95 1 0 0 0.05
T 0 0.00 0 1 0 0.00
```

In context dependent model different statistical conversion models are applied to different genomic contexts. There are 5 different contexts

- 1 DGCH (isolated GpC)
- 2 HCGD (isolated CpG)
- 3 CH and not DGCH
- 4 NCN or NGN and not 1-3
- 5 Other

For example the sequence GCGCAGGACACAT will be interpreted as the being in the contexts 44435225115355. In context dependent mode  $5 \times 2$  list of matrices needs to be specified. Context dependent mode is used for NOME-seq data, where the conversion models for context 1, 2 and 5 are identical to the standard bisulphite conversion model listed above. However, the conversion models for context 3 and 4 are identical, but modified such that CpG methylation is ignored. The conversion matrices for context 4 is given in Listing 6.

The program epiG may further be configured using the `epiG_config` command; see the manual for details.

**Listing 6 NOME-Seq conversion matrices for NCN and NGN context**

```

model$ fwd_C_G[[1]]
  C G A T C^me G_me
C 0.5 0 0 0 0.5 0
G 0.0 1 0 0 0.0 1
A 0.0 0 1 0 0.0 0
T 0.5 0 0 1 0.5 0

model$ rev_C_G[[1]]
  C G A T C^me G_me
C 1 0.0 0 0 1 0.0
G 0 0.5 0 0 0 0.5
A 0 0.5 1 0 0 0.5
T 0 0.0 0 1 0 0.0

```

**3 Running Bis-SNP**

We used the the following command and options when running Bis-SNP.

**Listing 7 Running Bis-SNP**

```

java -Xmx4g -jar BisSNP-0.82.2.jar
-R hg19_rCRSchrn.fa
-T BisulfiteGenotyper
-I LNCaP.recal.bam
-D dbsnp_135.hg19.sort.vcf
-stand_emit_conf -10
-nt 8
-out_modes EMIT_ALL_SITES
-vfn1 cpq.raw.vcf

```

**Author details****References**

1. Fang F, Hodges E, Molaro A, Dean M, Hannon GJ, Smith AD: Genomic landscape of human allele-specific DNA methylation. *Proc Natl Acad Sci USA*. 2012;109(19):7332–7337.
2. Kelly TK, Liu Y, Lay FD, Liang G, Berman BP, Jones PA: Genome-wide mapping of nucleosome positioning and DNA methylation within individual DNA molecules. *Genome Res*. 2012;22:2497–2506.
3. Genereux DP, Johnson WC, Burden AF, Stöger R, Laird CD: Errors in the bisulfite conversion of DNA: modulating inappropriate-and failed-conversion frequencies. *Nuc Acids Res*. 2008;36:150–150.
4. Leontiou CA, Hadjidaniel MD, Mina P, Antoniou P, Ioannides M, Patsalis PC: Bisulfite Conversion of DNA: Performance comparison of different kits and methylation quantitation of epigenetic biomarkers that have the potential to be used in non-invasive prenatal testing. *PLoS ONE*. 2015;10(8): e0135058.

## 4 Additional tables and figures

Table S1. Parameters and their default values for WGBS and NOME-seq data.

Table S2. List of 18 AMRs used in Fig. 5 in the main text, from [1].

The data is filtered for noise as described in the main text.

S1-S18. Analysis of 18 AMRs in Table S2 (18 figures).

Generally, the number and extent/length of haplotype chains in the four samples are highly comparable for all 18 AMRs. The data is filtered for noise as described in the main text. Vertical bars indicate the known regions of ASM in each of the 18 gene regions [1]. These regions are the combined ASM regions compiled from 22 methylomes from cell lines and tissue samples (not including colon) [1].

S19. Periodic pattern in nucleosome occupancy data.

The plots show strong periodicity in nucleosome occupancy with a phasing corresponding roughly to the length of the nucleosome,  $\sim 150$ bp. CpG methylation shows similar periodicity, except for a 400-500bp CpG methylation repressed region around the CTCF site. Importantly, this validation only tests the position-wise consensus prediction over many sites and does not use the information contained in the inferred haplotype chains.

S20. Noise: depth fraction and length of haplotype chains.

Decision line to filter out noise based on depth fraction and length of the haplotype chain.

S21. Noise in inferred haplotype chains in GNAS locus.

S22. Noise in inferred haplotype chains in H19 gene.

S23. ROC curves for methylation validation, with default parameters  $\alpha = 0.95$  and  $\beta = 0.05$ .

All parameters are put to their default values, see Table 3 in the main text.

S24. Genotype validation, correctly called SNPs.

The figure extends that of Fig. 10 in the main text. SNP genotyping is best for the homozygous genotypes and for AC, CG, TA, TG, and less good for CT, AG. The latter genotypes might be confused with methylation marks.

S25. AUC curves for methylation validation, with varying bisulphite conversion rate ( $\alpha$ ) and inappropriate conversion rate ( $\beta$ ).

The performance of epiG, when measured by AUC, does not change significantly for other parameter values than the default parameters; the AUC varies between 0.96 to 0.98.

S26. SNP validation and the prior  $\pi_1(G|B)$ .

A high  $q$  value in the prior is recommended.

S27.  $K_0, K_1$  parameters.

If the overlap in CpG sites is set to zero ( $K_0 = 0$ ), two reads that overlap but that do not share a CpG site, will be grouped together. Hence reads from biologically different epi-alleles might accidentally be joined.

S28. Read depth for the data used in the main text.

The read depth varies throughout the genome and for the different samples. Read depth is generally very low for LNCaP and PrEC, while significantly higher for the other samples (see also Table 4 in the main text).

| Name                | Description                             | WGBS<br>(single) | WGBS<br>(paired) | NOMe-seq<br>(paired/single) |
|---------------------|-----------------------------------------|------------------|------------------|-----------------------------|
| bisulfite_rate      | Bisulfite conversion rate               | 0.95             | 0.95             | 0.95                        |
| bisulfite_inap.rate | Bisulfite inappropriate conversion rate | 0.05             | 0.05             | 0.05                        |
| min_overlap_length  | Minimum overlapping length              | 40               | 50               | 40                          |
| min_CG_count        | Minimum overlapping CG positions        | 1                | 2                | 0                           |
| min_HCGD_count      | Minimum overlapping HCGD positions      | 0                | 0                | 0                           |
| min_DGCH_count      | Minimum overlapping DGCH positions      | 0                | 0                | 2                           |
| ref_prior           | Genotype prior parameter                | 0.9999           | 0.9999           | 0.9999                      |
| margin              | Cut off margin                          | 5                | 5                | 5                           |
| use_paired_reads    | Use paired reads                        | FALSE            | TRUE             | TRUE/FALSE                  |
| context_dependent   | Context dependent mode                  | FALSE            | FALSE            | TRUE                        |
| max_iterations      | Max number of iterations                | 1e5              | 1e5              | 1e5                         |
| quality_threshold   | Read mean epsilon quality threshold     | 0.020            | 0.020            | 0.020                       |

**Table S1 Parameters and their default values for WGBS and NOMe-seq data.**

| Chromosome | Region (hg19) |           | Gene/locus                 | Reference                 |
|------------|---------------|-----------|----------------------------|---------------------------|
| 1          | 68515537      | 68517691  | LOC100289178               | Yu et al. (1999)          |
| 4          | 89617864      | 89619549  | HERC3                      | Monk et al. (2011)        |
| 7          | 130129559     | 130133682 | MESTIT1, MIR335, MEST      | Kobayashi et al. (1997)   |
| 7          | 94284018      | 94289851  | SGCE, PEG10                | One et al. (2001)         |
| 7          | 27179065      | 27187138  | HOXA6, HOXA5, LOC100133311 | Strathdee et al. (2006)   |
| 10         | 127584249     | 127588031 | FANK1                      | Li et al. (2010)          |
| 11         | 10527505      | 10531695  | AMPD3, RNF141              | Schultz et al. (2006)     |
| 11         | 2719386       | 2722440   | KCNQ1                      | Horike et al. (2000)      |
| 11         | 2016476       | 2024739   | H19, MIR675                | Licifer et al. (2004)     |
| 14         | 101290239     | 101295152 | MEG3                       | Rocha et al. (2008)       |
| 15         | 25199298      | 25202152  | SNRPN, SNURF               | Sutcliffe et al. (1994)   |
| 16         | 3492753       | 3494769   | ZNF597, NAA60, NAT15       | Nakabayashi et al. (2011) |
| 19         | 57348719      | 57353128  | MIMT1, ZIM2, PEG3          | Huang et al. (2009)       |
| 20         | 57414161      | 57418015  | GNAS-AS1                   | Frohlich et al (2010)     |
| 20         | 57424981      | 57431470  | GNAS-AS1, GNAS             | Frohlich et al (2010)     |
| 20         | 30134590      | 30135902  | HM13                       | Monk et al. (2011)        |
| 20         | 57463105      | 57465570  | GNAS                       | Frohlich et al (2010)     |
| 20         | 36148274      | 36151269  | BLCAP, NNAT                | Evans et al. (2001)       |

**Table S2 Known allele-specific methylated regions (AMRs) used in this study; see Additional figure S1-S18 and [1] for further details. Gene/locus assignment is taken from [1] and not the original publications.**



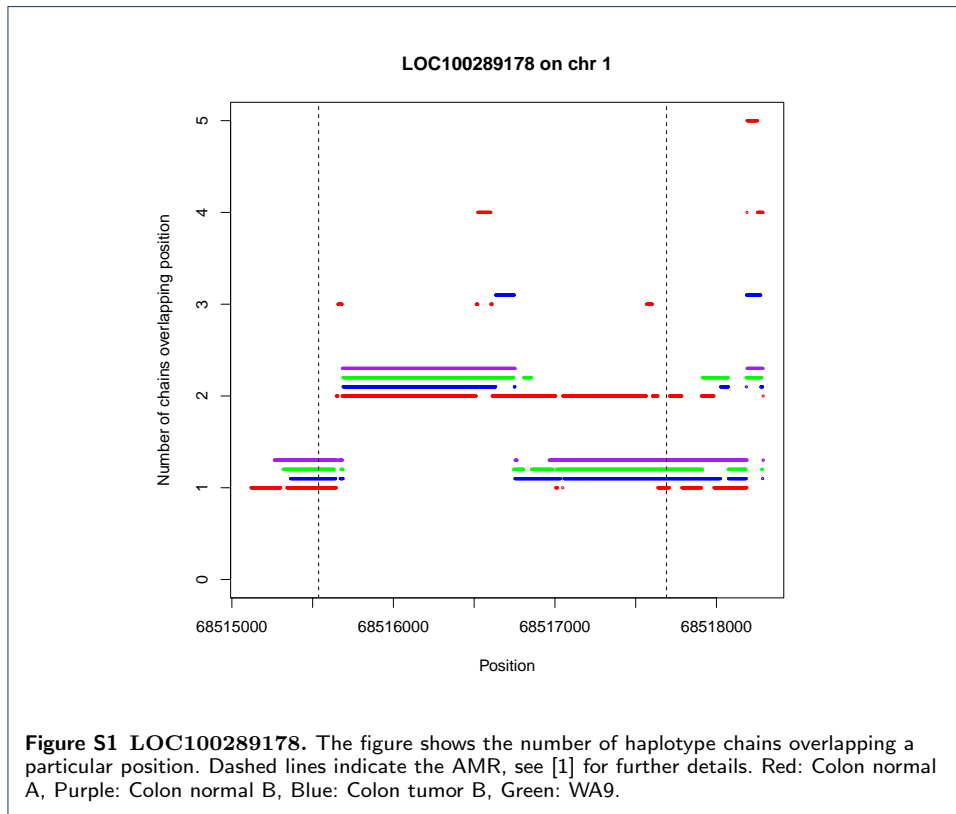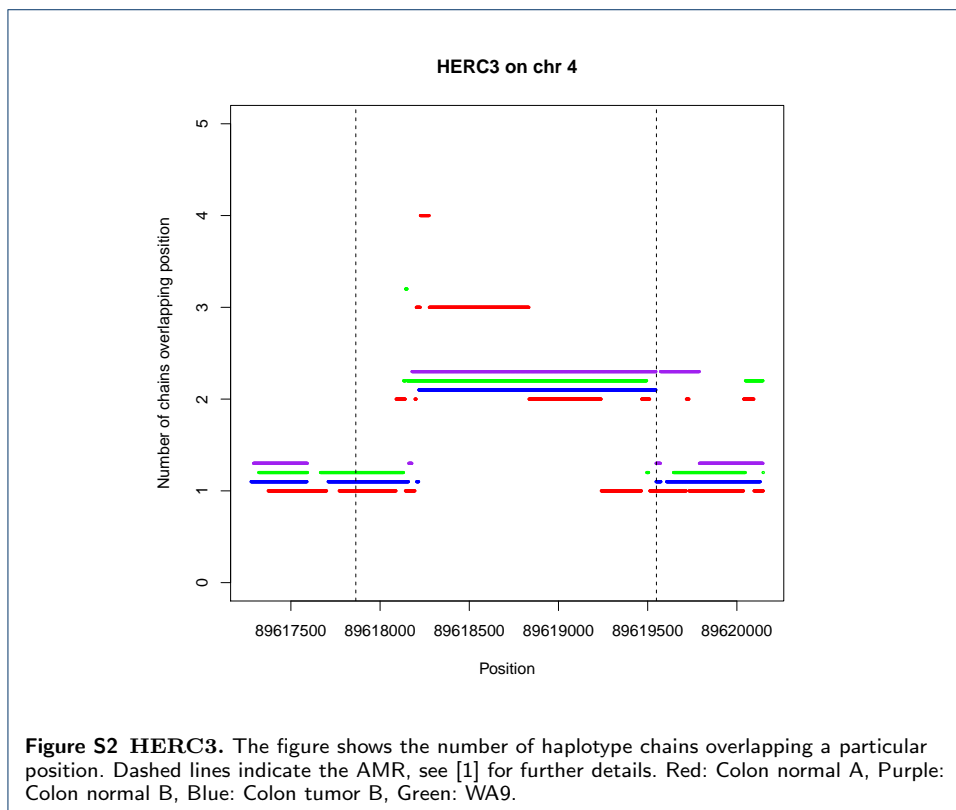

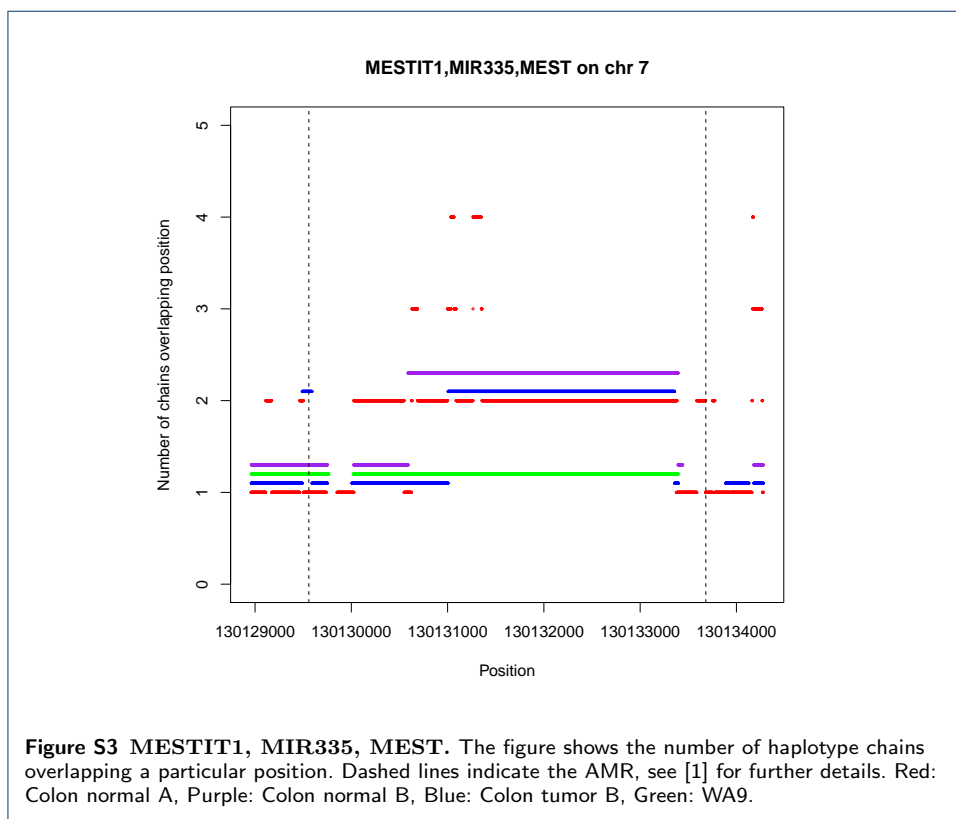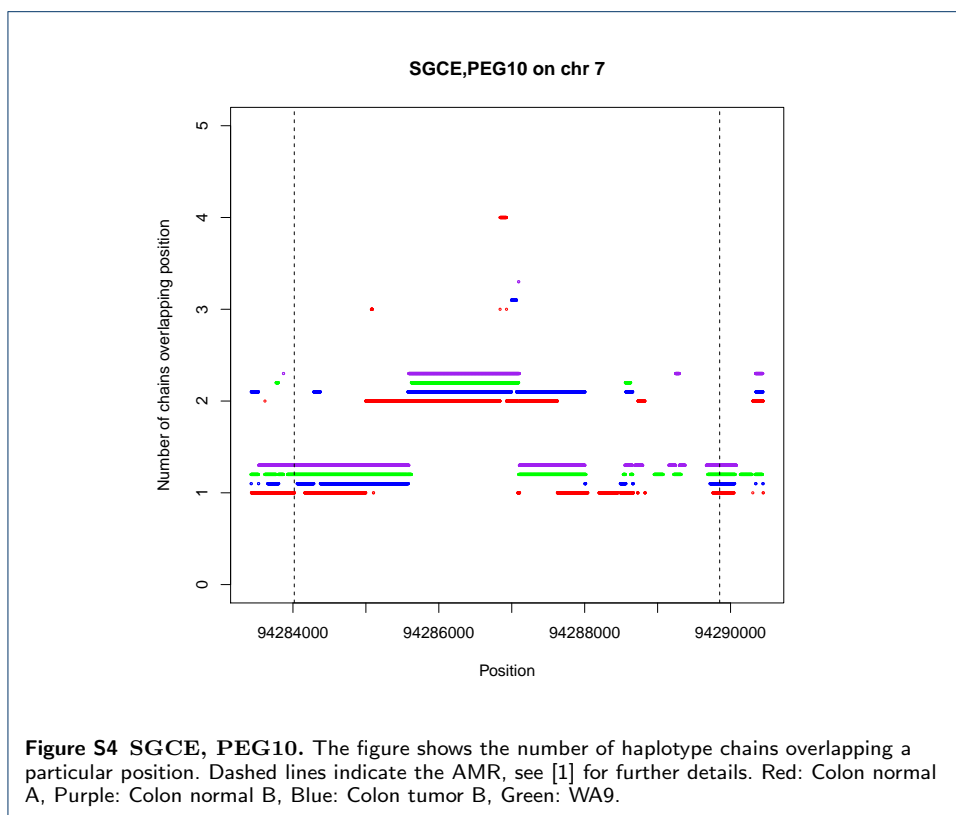

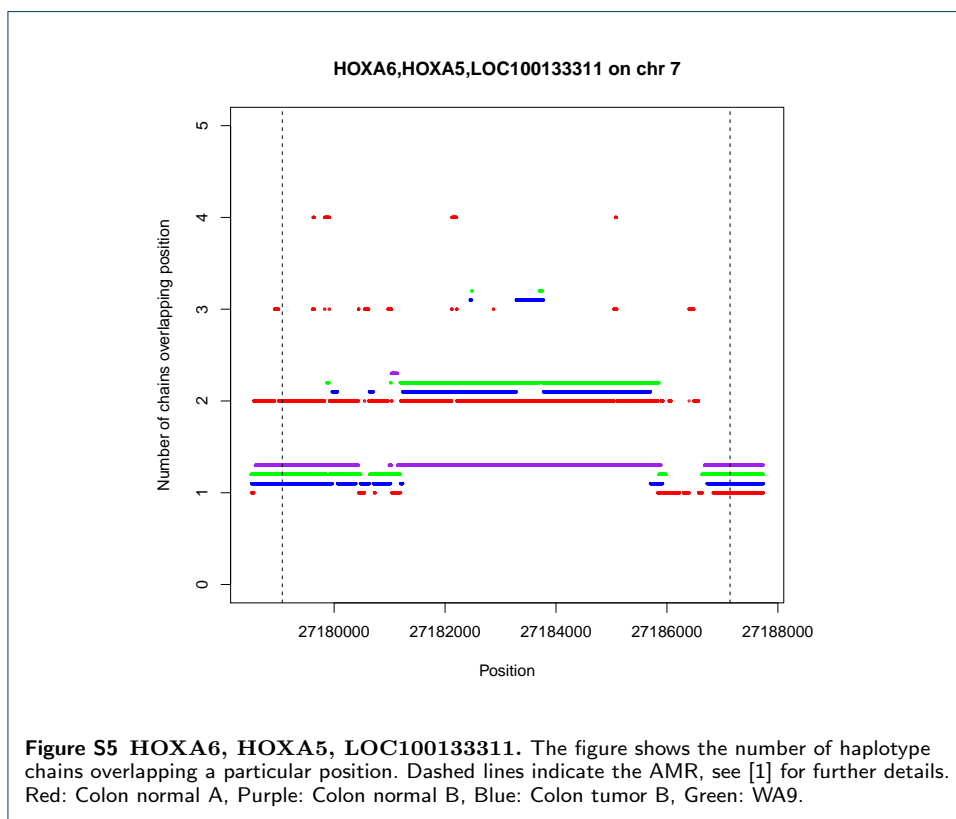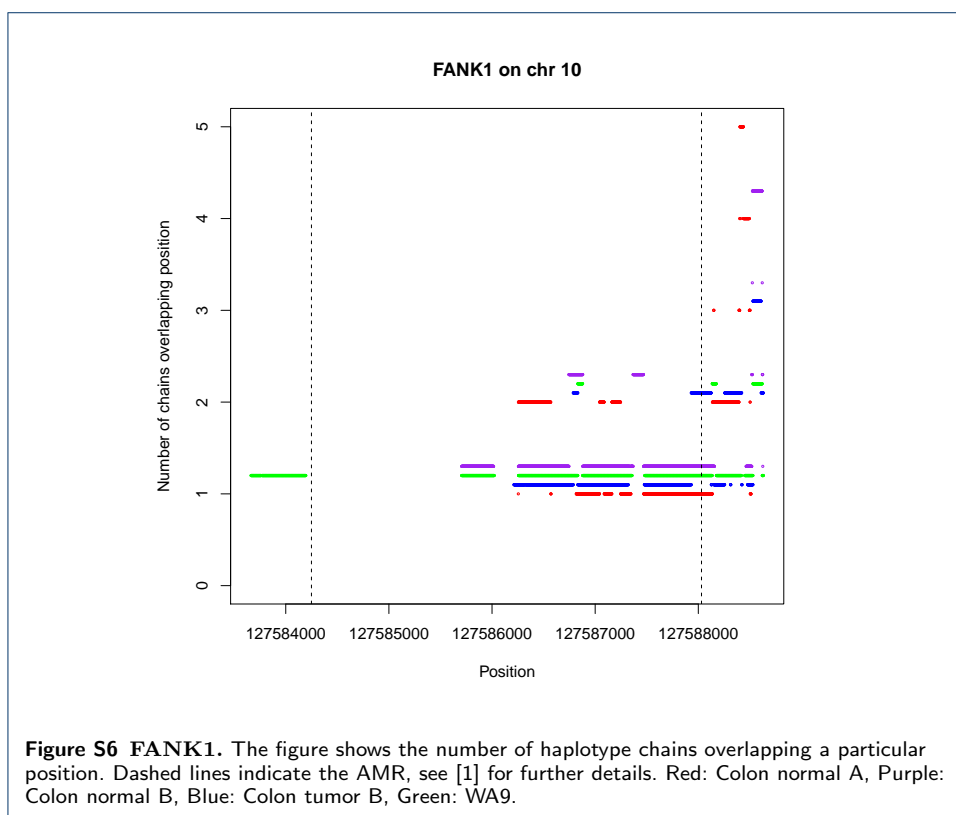

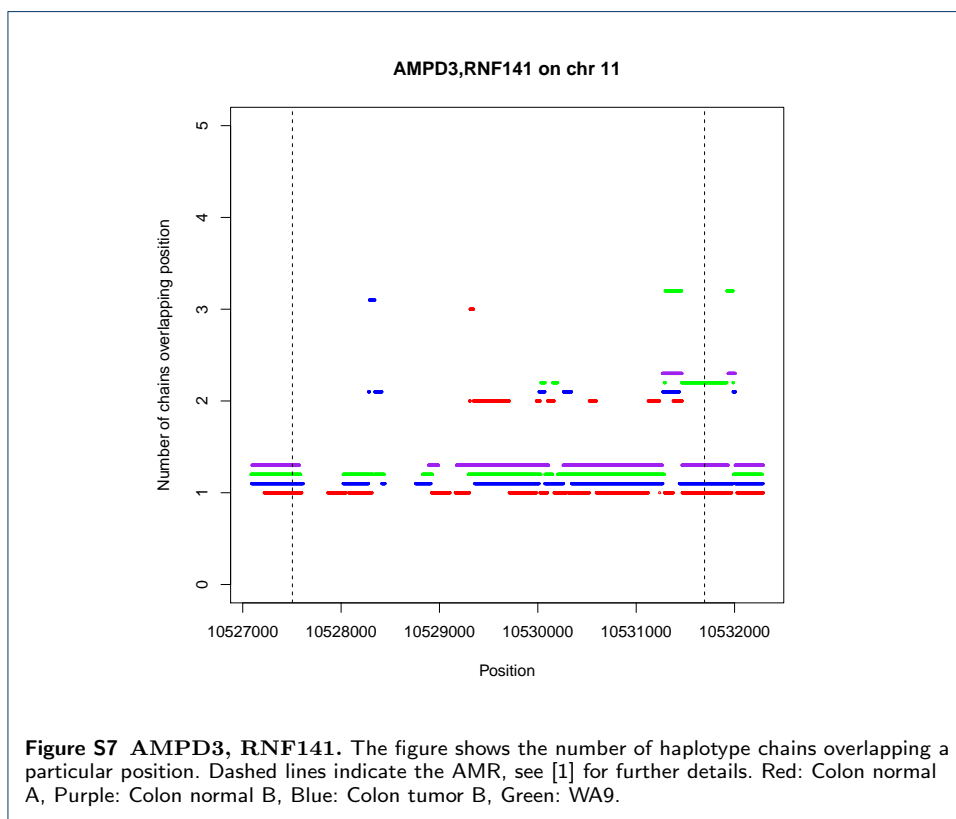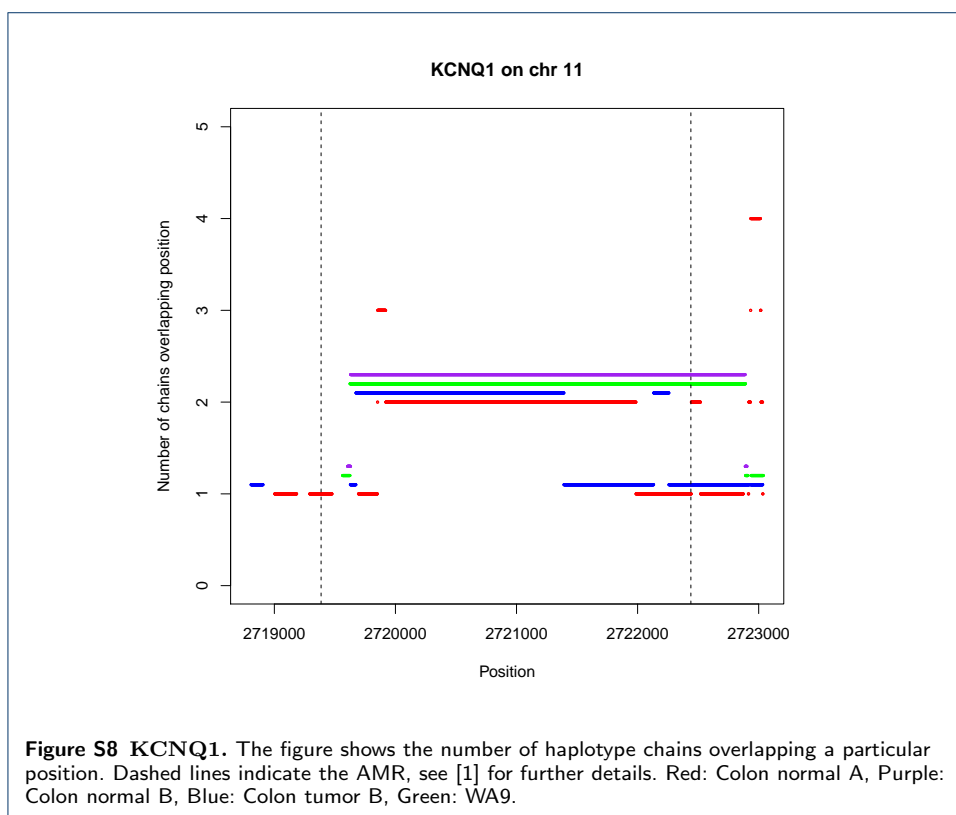

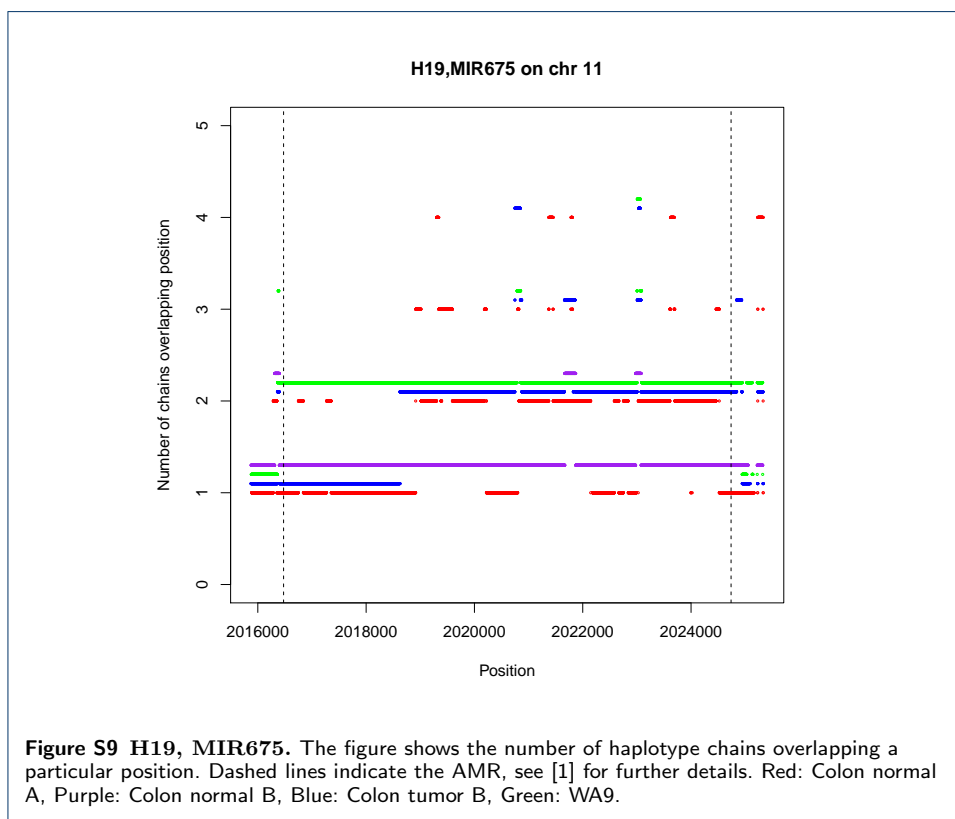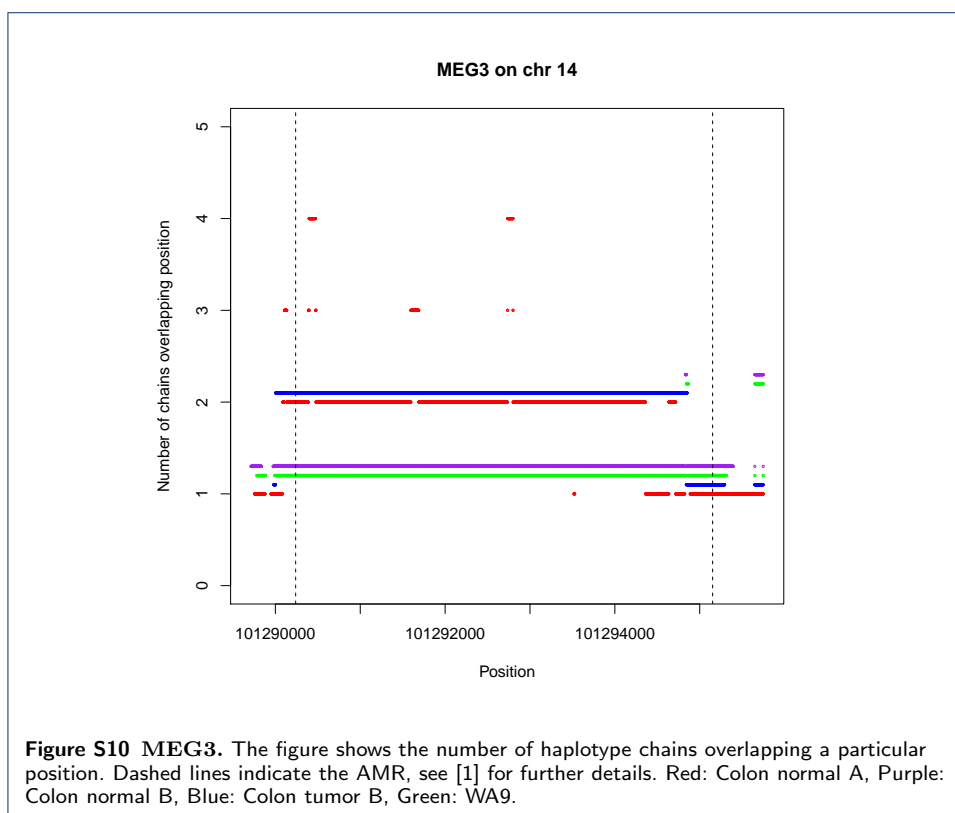

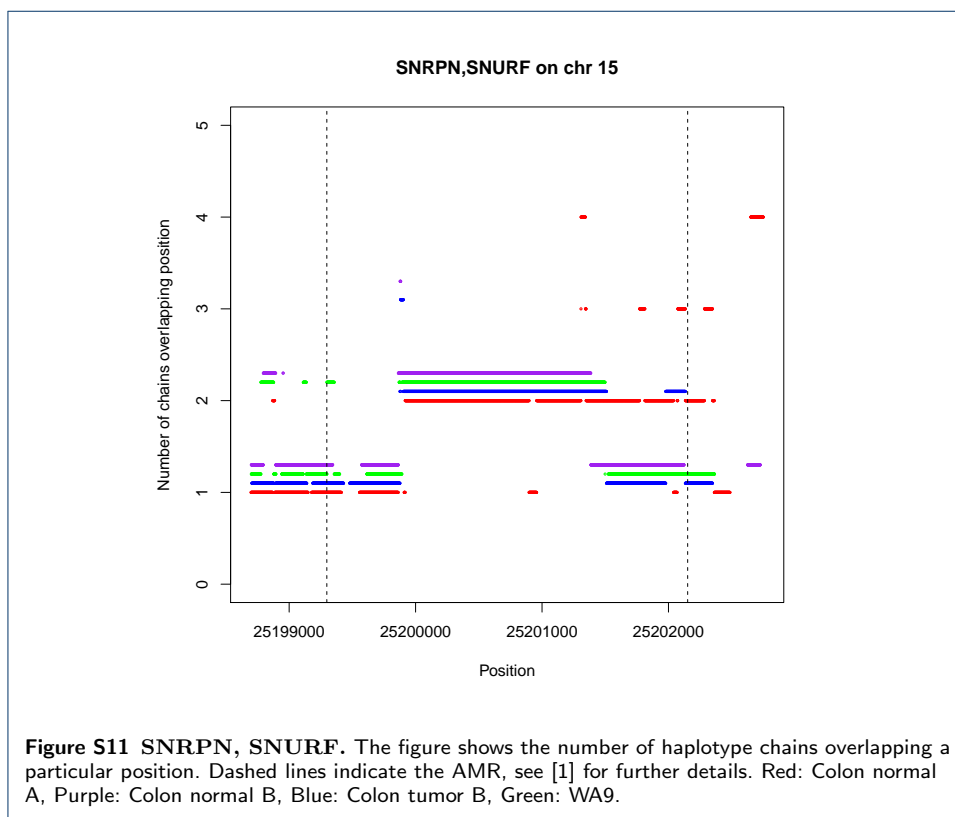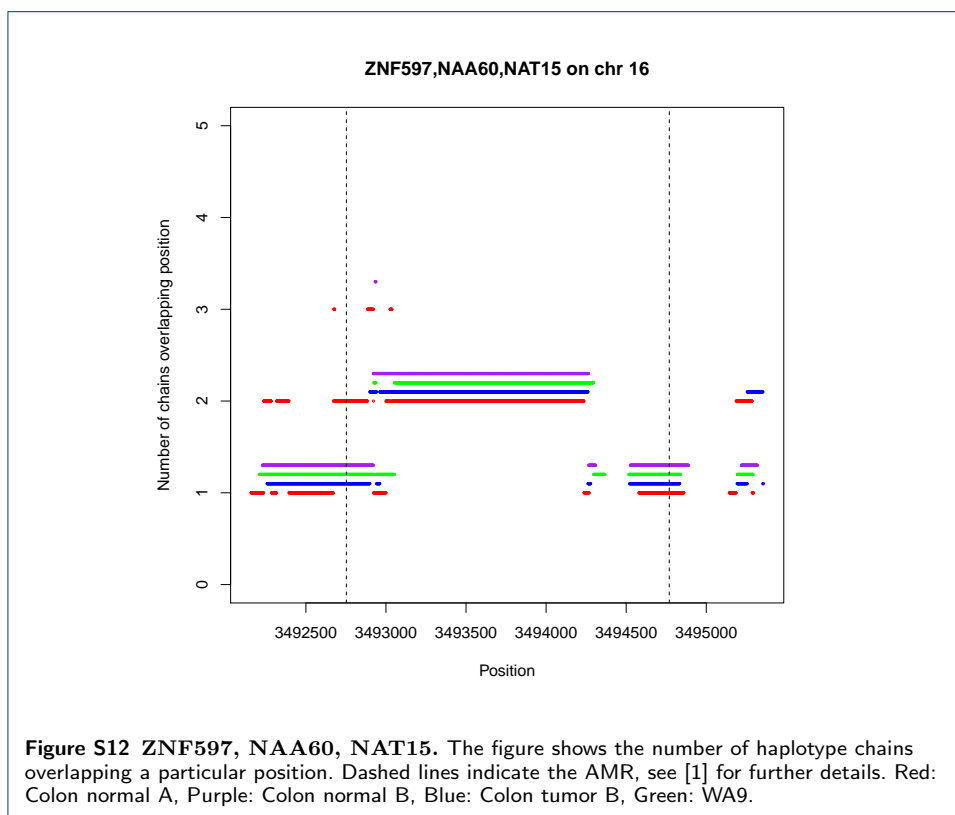

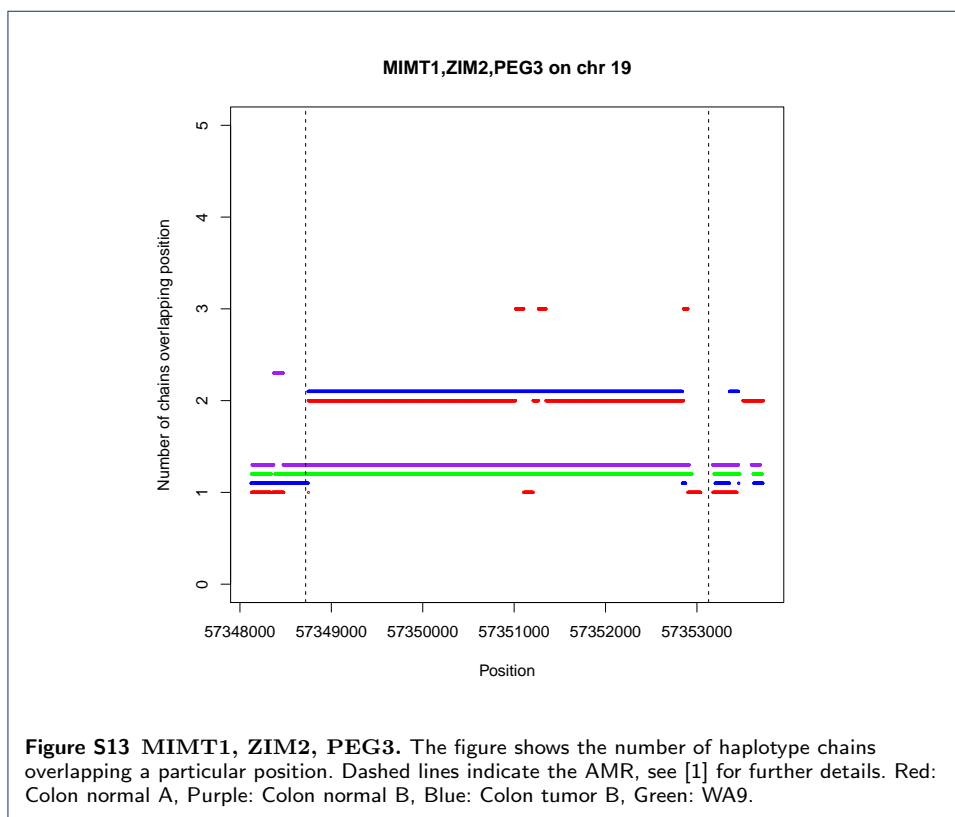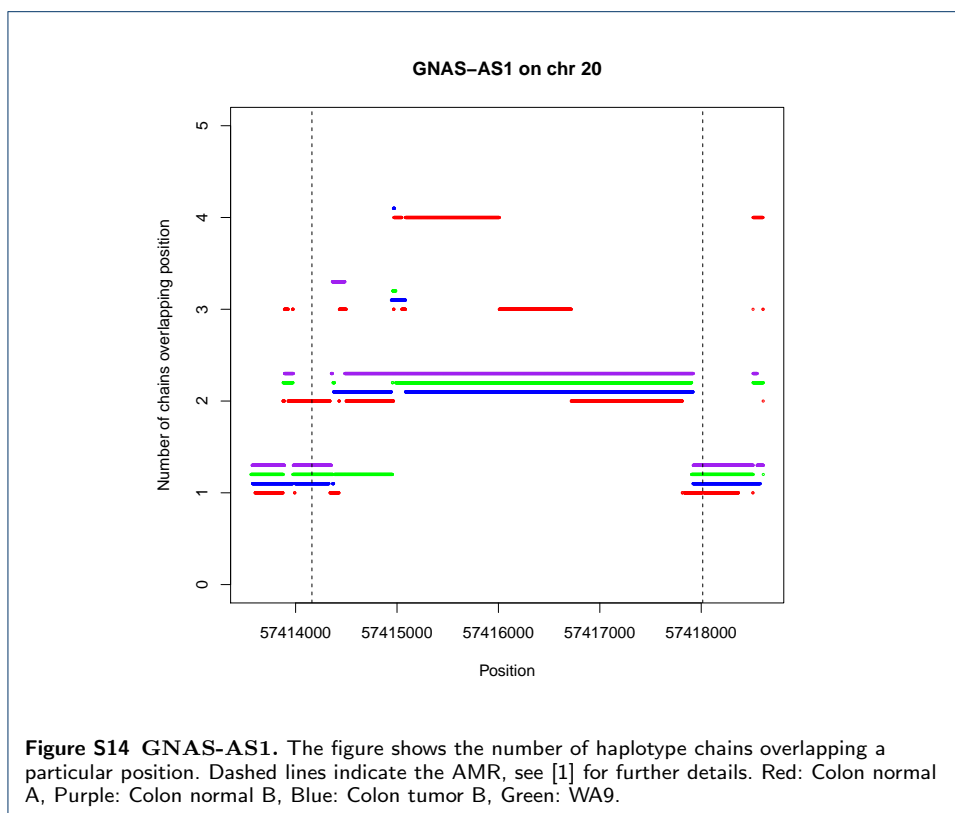

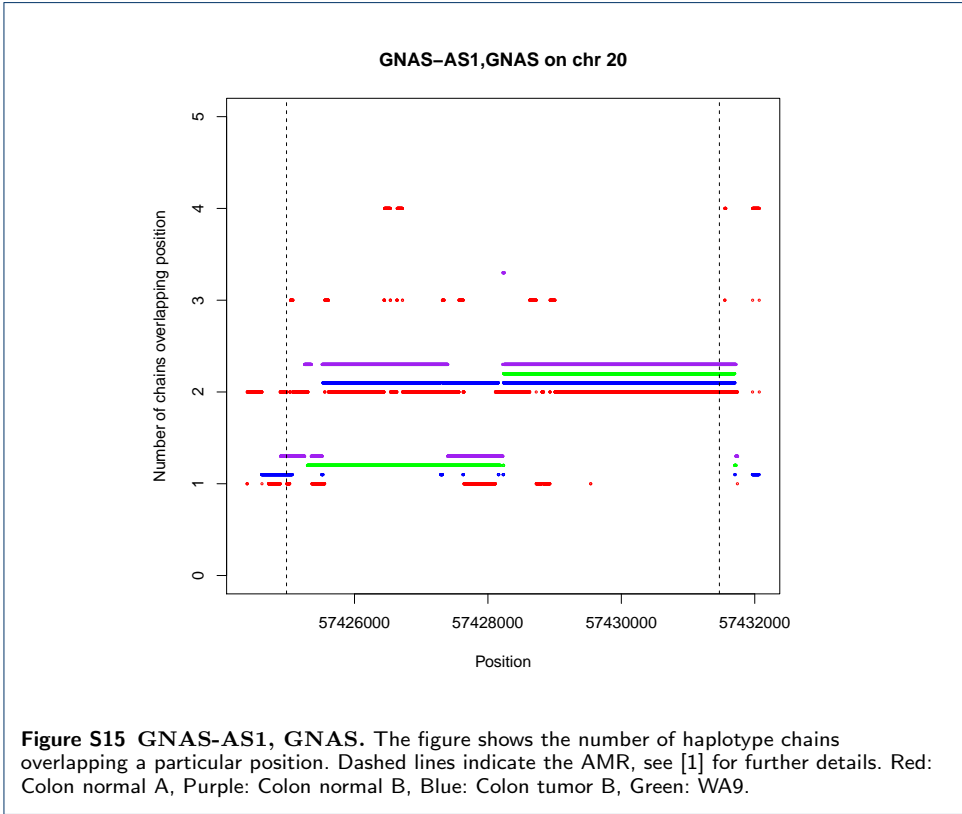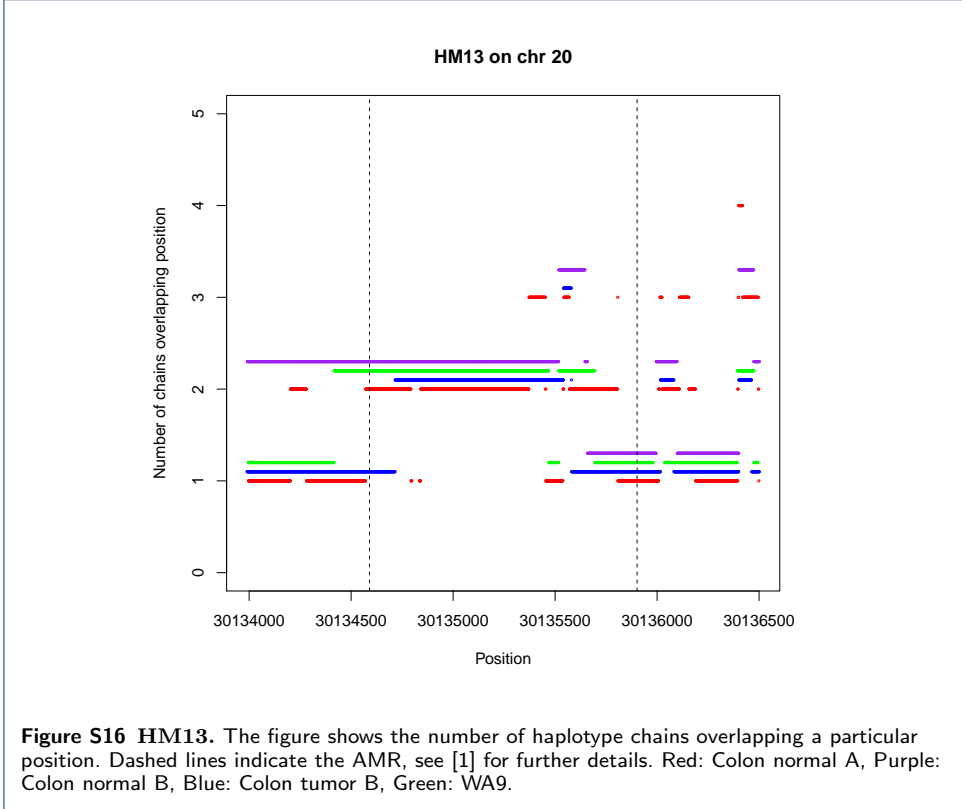



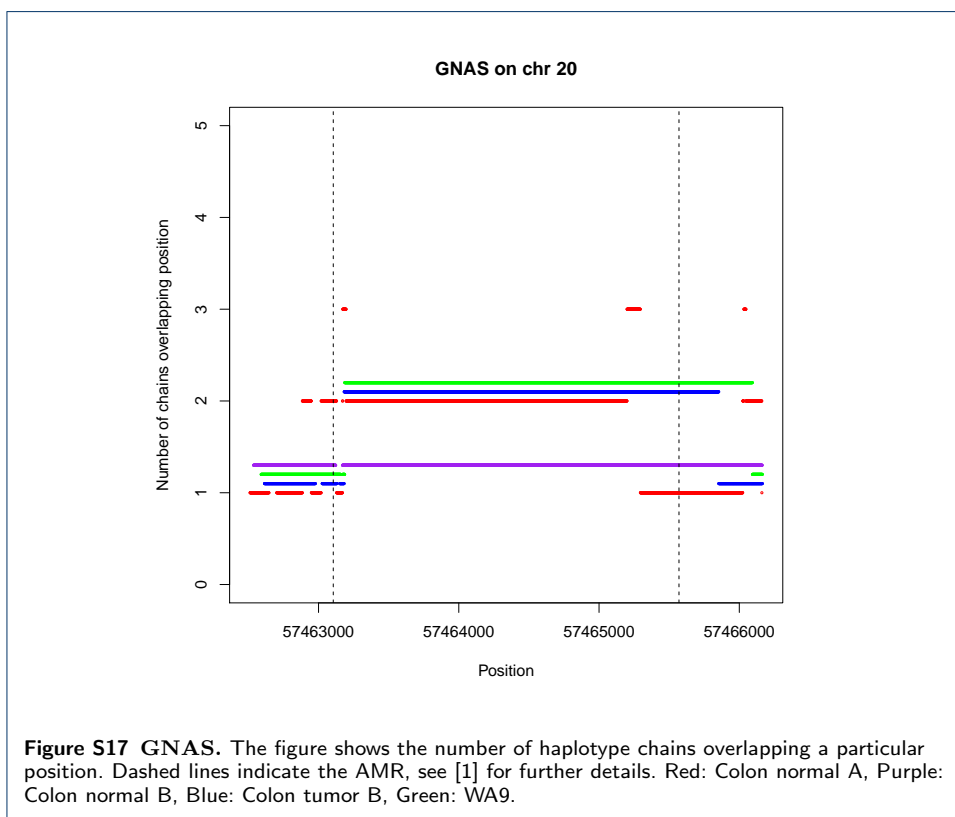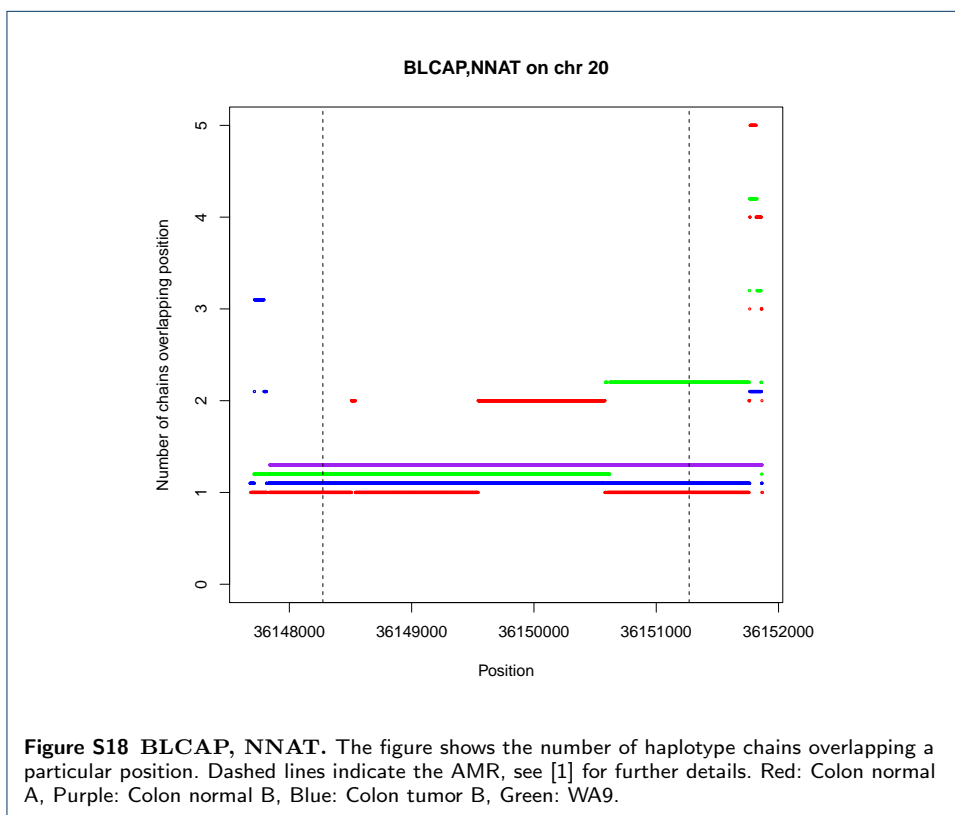

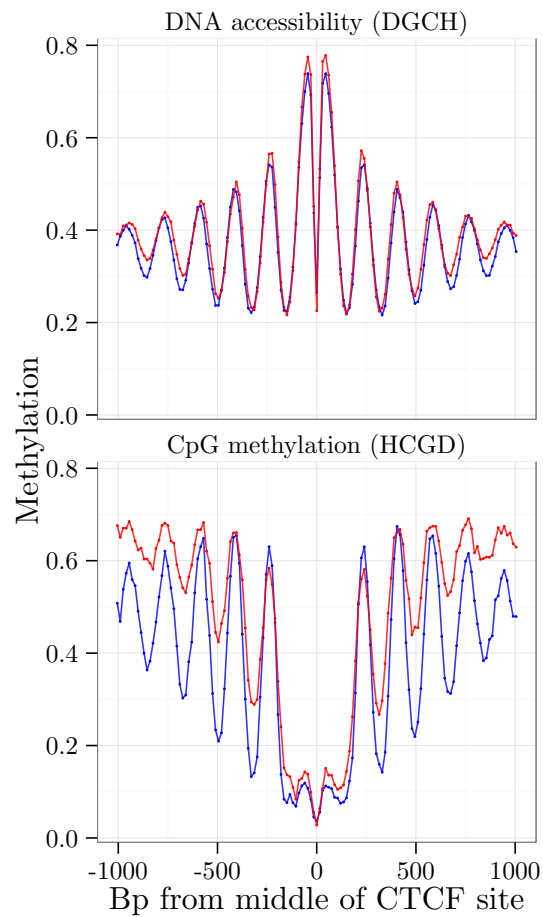

**Figure S19** Average CpG and GpC methylation near CTCF sites. Top: average methylation level at DGCH positions plotted against the distance from the CTCF site, using the same collection of CTCF sites as in [2]. Bottom: average methylation level at HCGD positions plotted against the distance from the CTCF site. Blue curve: LNCaP. Red curve: PrEC. Methylation levels are generally lower in PrEC than in LNCaP. The average methylation level is computed within windows of length 15bp.

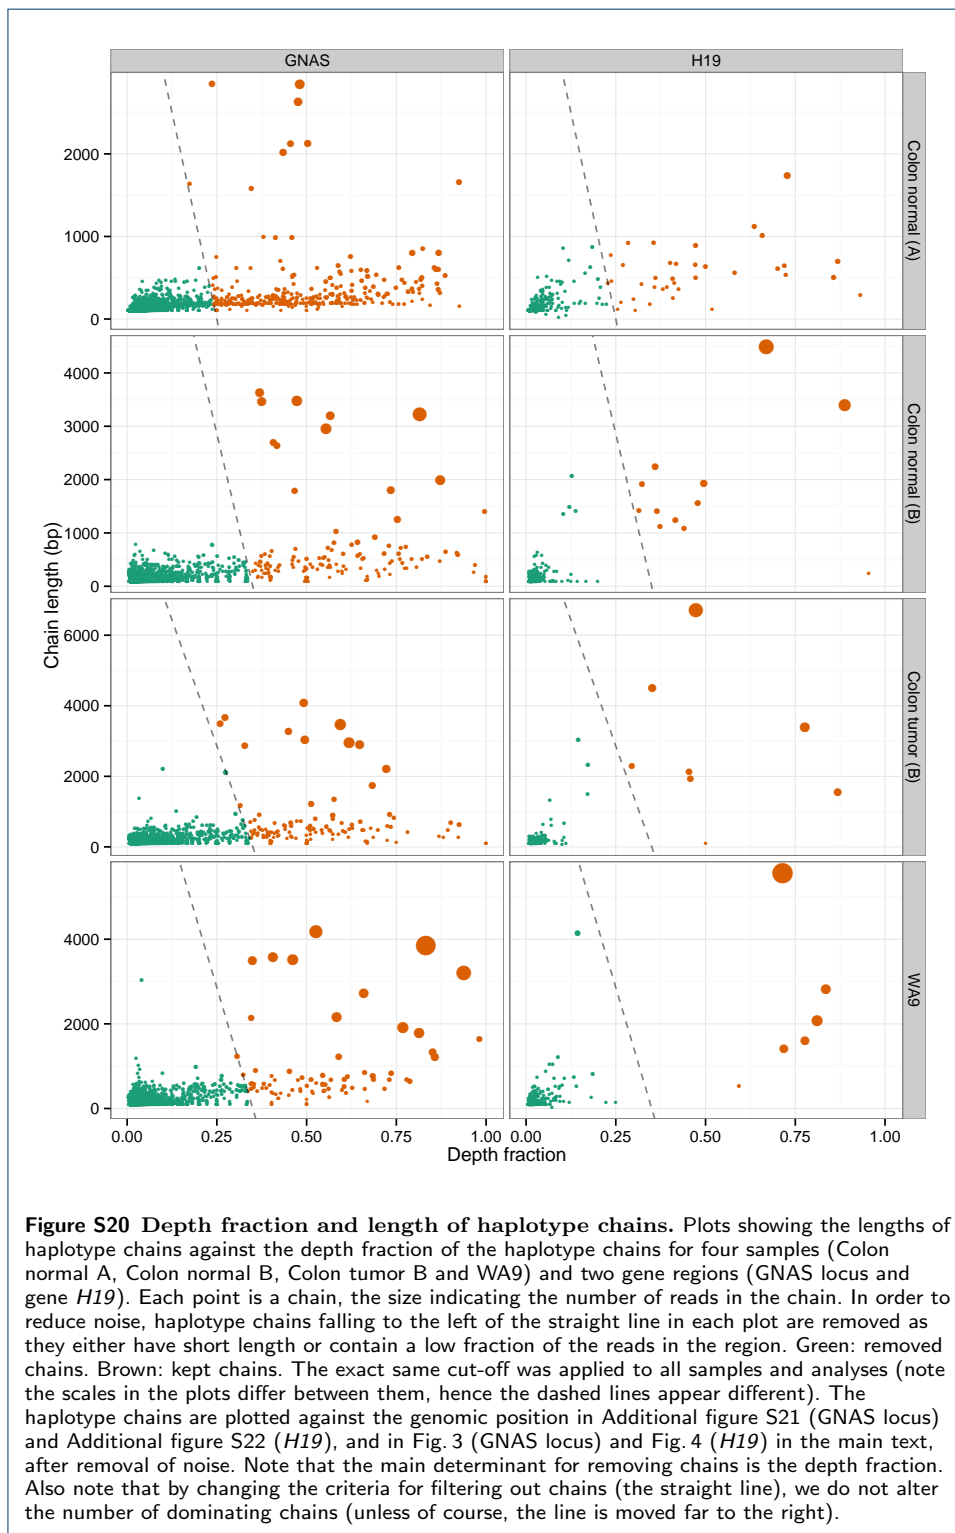

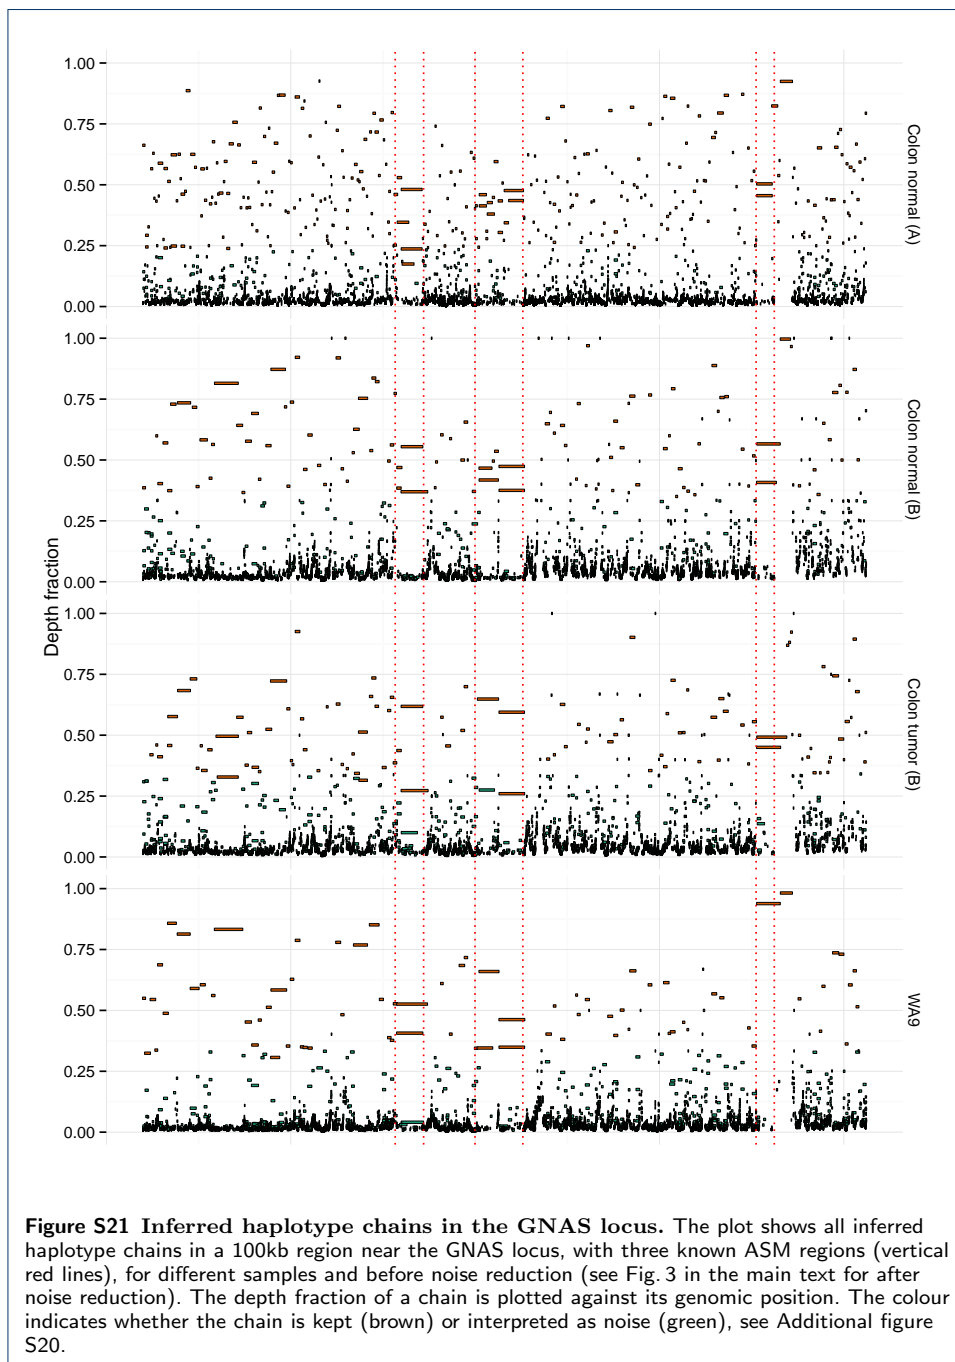

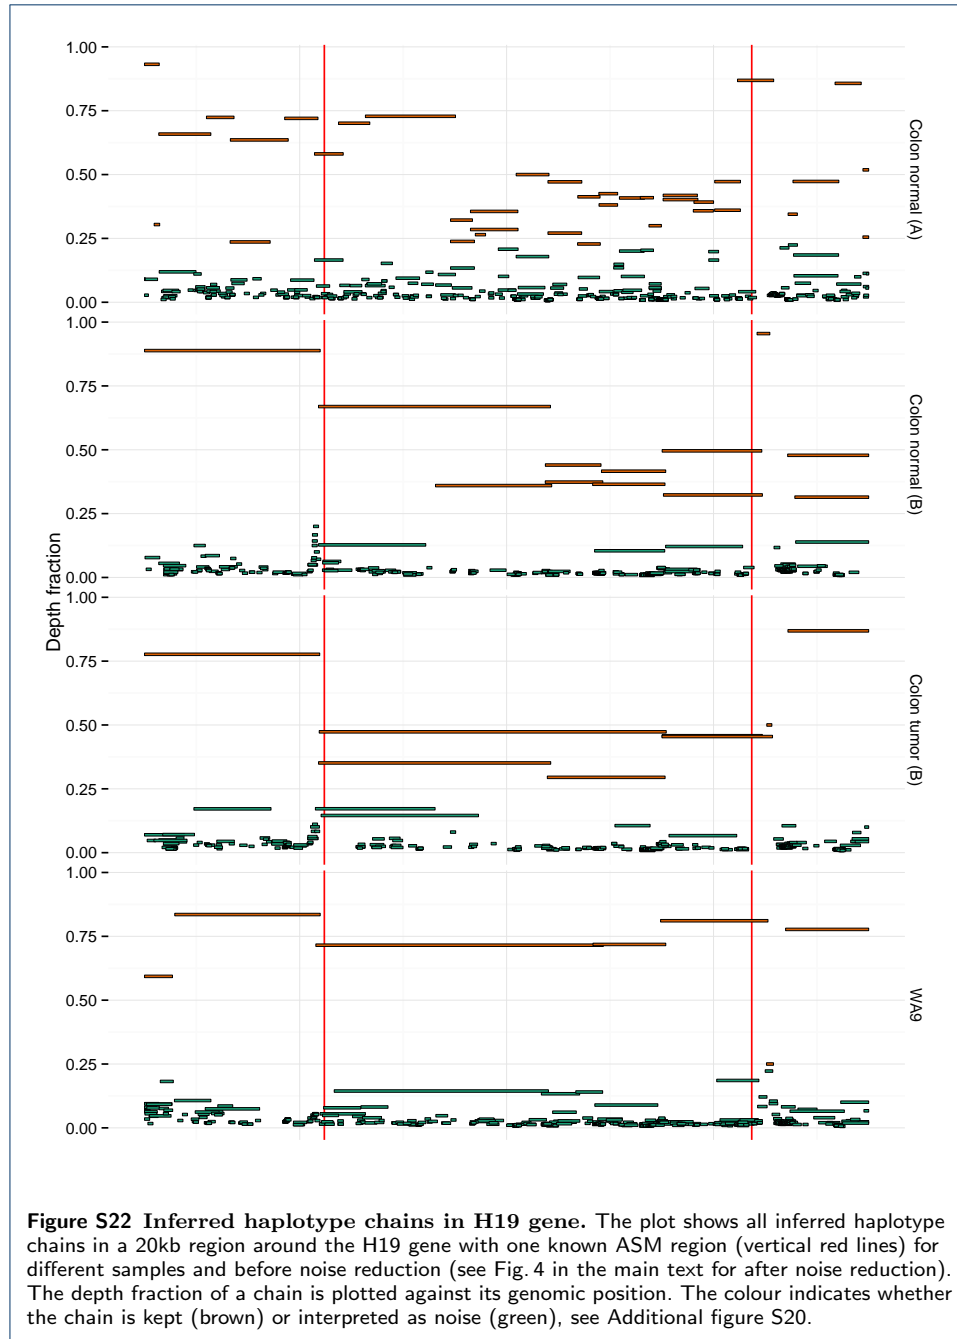

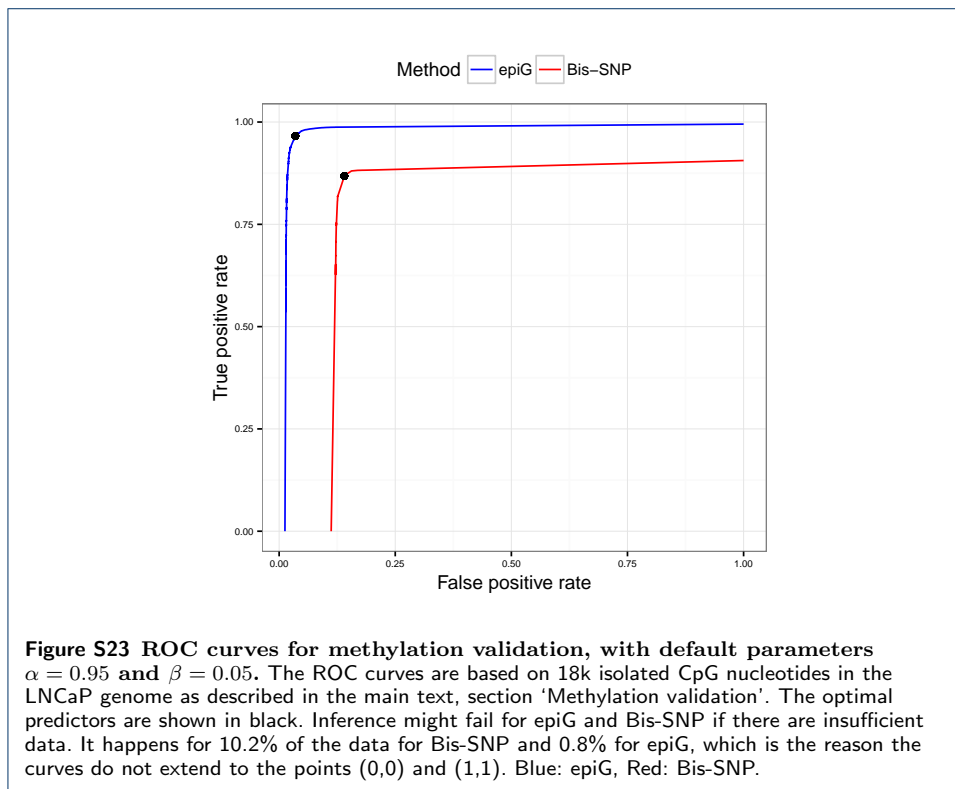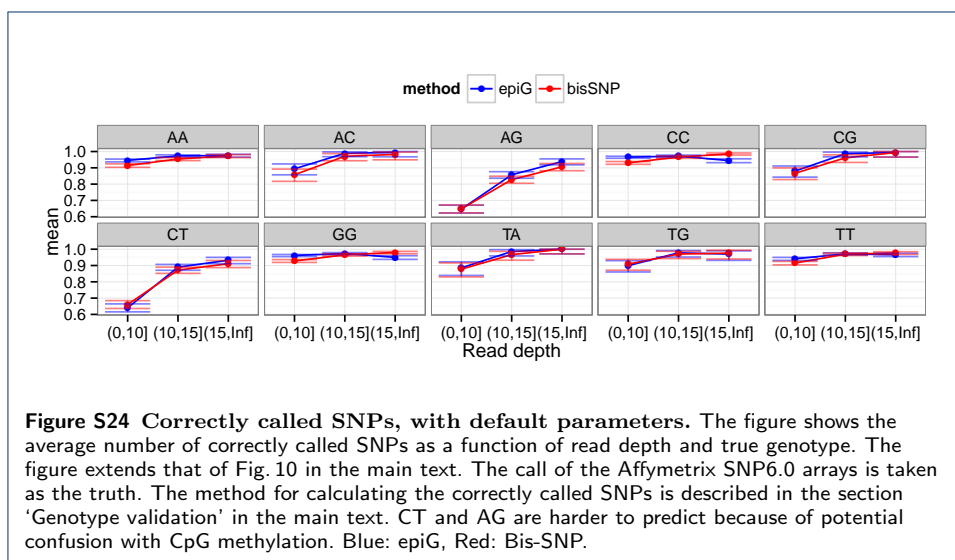

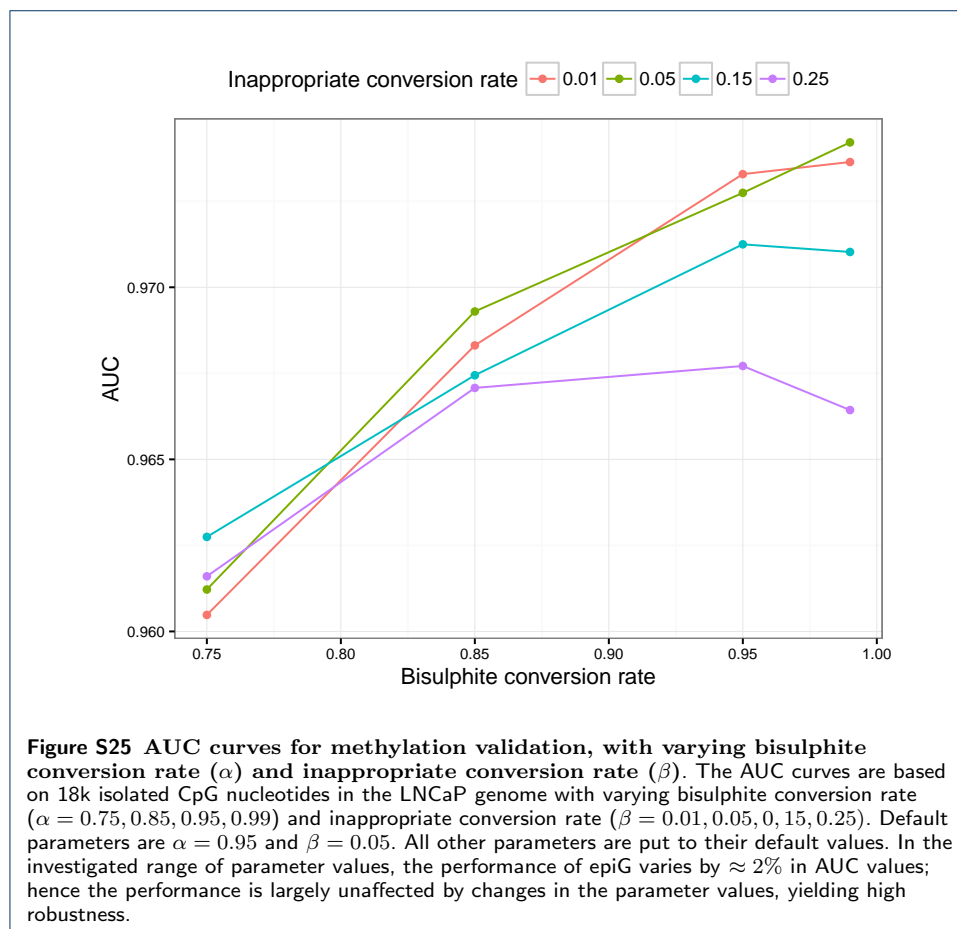

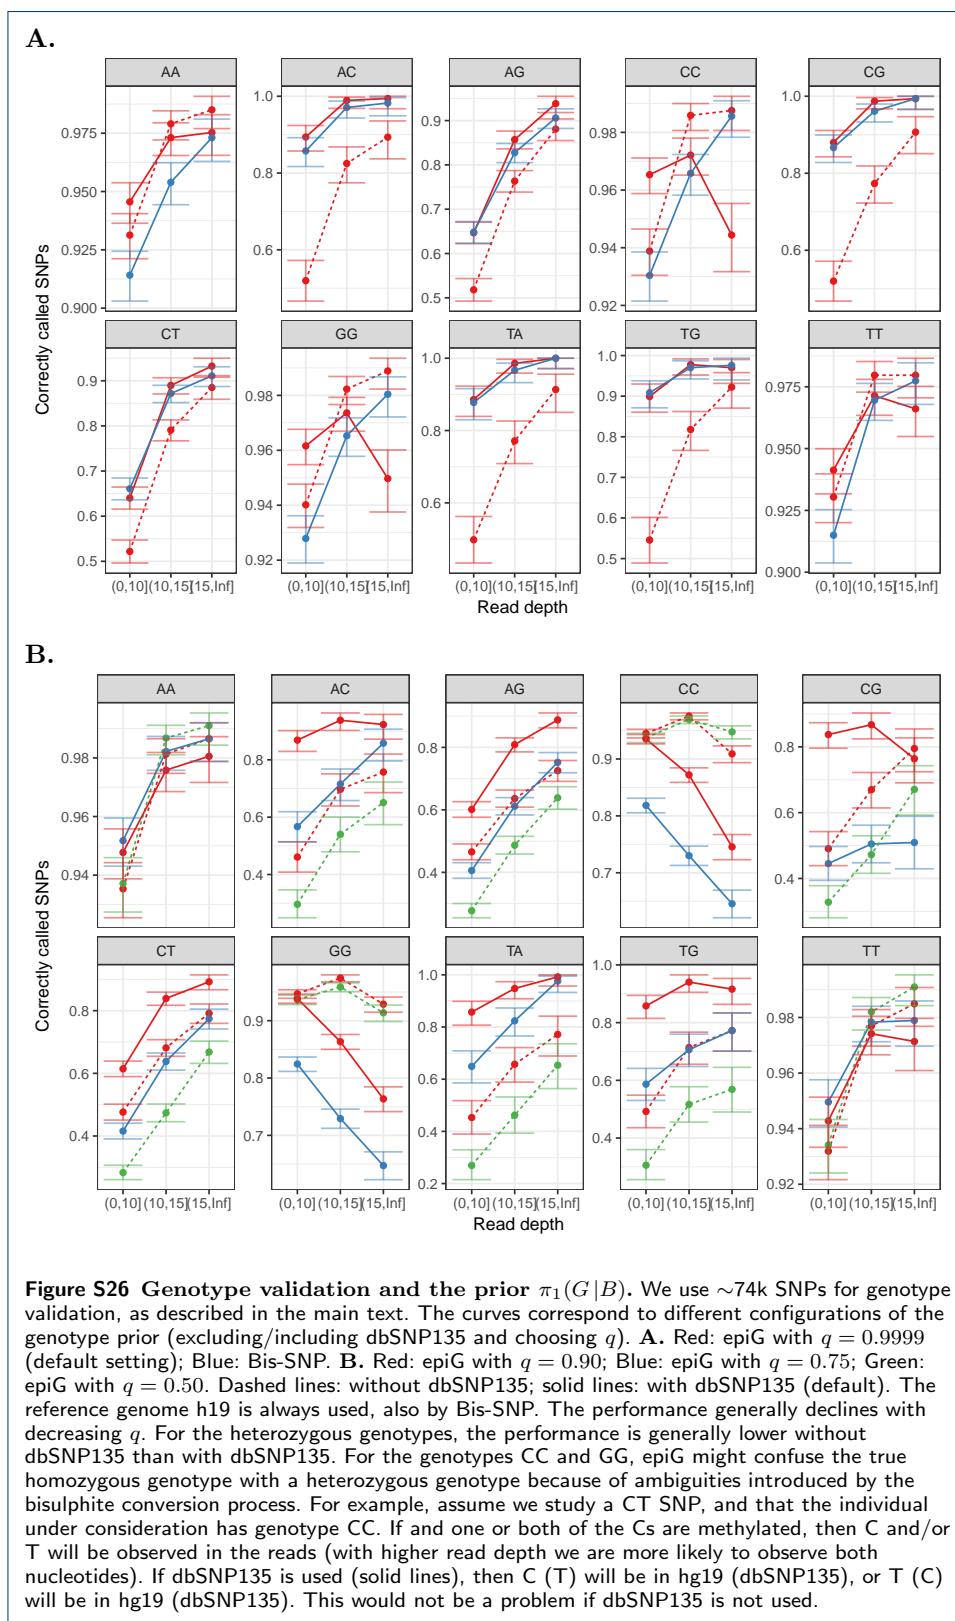



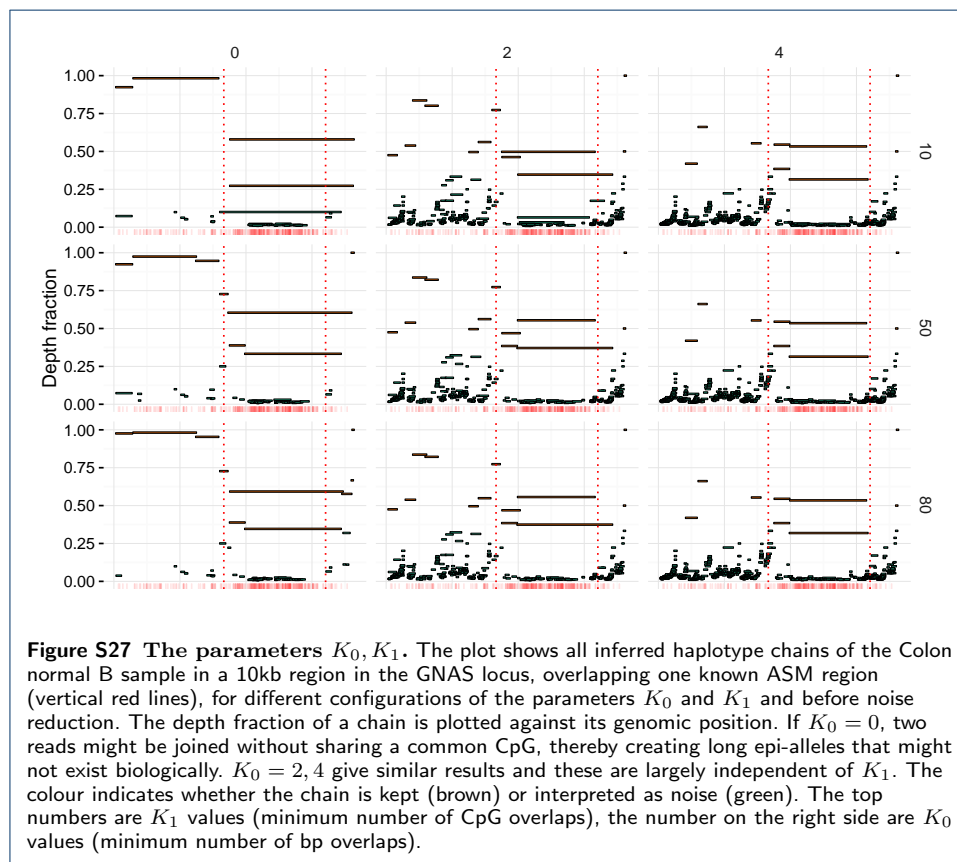

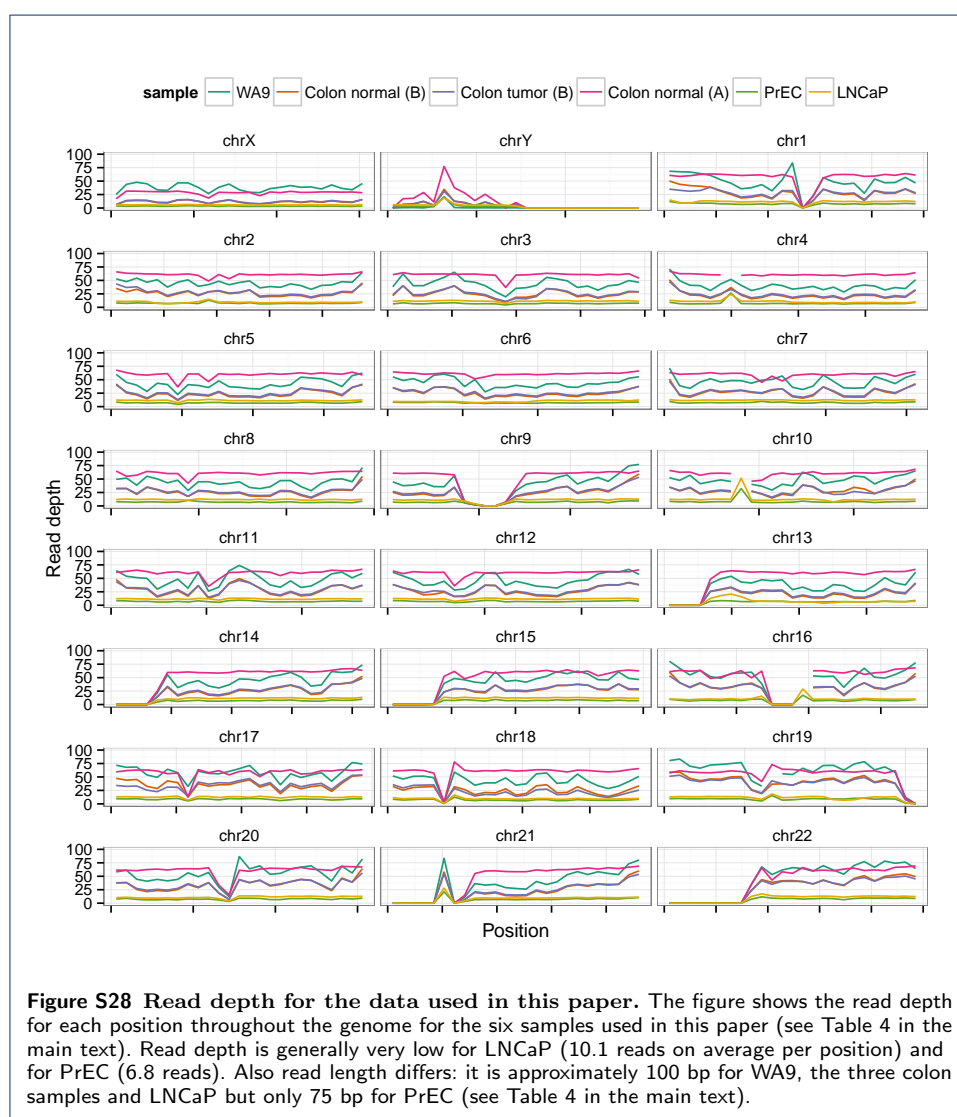

Supplement: 13059_2017_1168_MOESM1_ESM.pdf [file 13059_2017_1168_MOESM1_ESM.pdf]
